# Supplementary material for: Functional and molecular interactions between ERK and CHK2 in diffuse large B-cell lymphoma
Source: PubMed Central journal article supplement — Nat Commun. 2011 Jul 19;2:402–. doi: 10.1038/ncomms1404 (PMC3144586; doi:10.1038/ncomms1404), 2011-07-19
Supplement: ncomms1404-s1.pdf [file ncomms1404-s1.pdf]

## Supplementary information

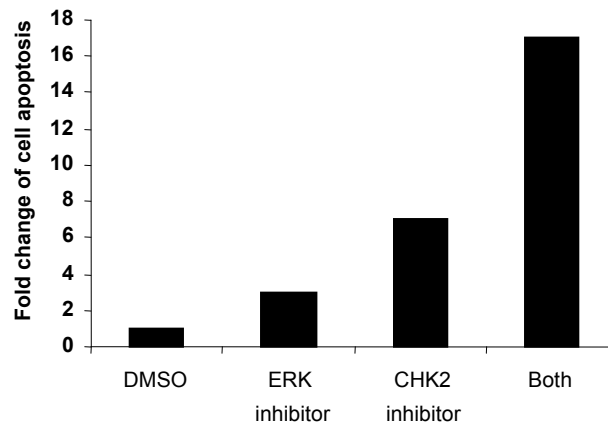

### Figure S1.

**Inhibition of ERK and CHK2 increases apoptosis in OCI-LY3 cells.** OCI-LY3 cells were exposed to 5 $\mu$ M CHK2 inhibitor II or 20 $\mu$ M ERK inhibitor alone or in combination for 72hrs after which the percentage of apoptotic cells was determined by Annexin V analysis as described in Materials and Methods.

**a**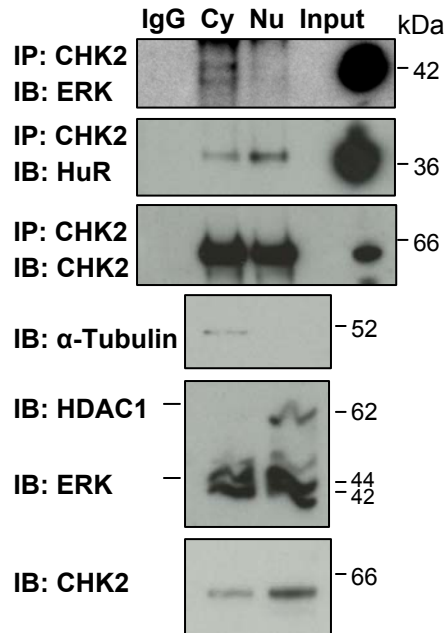**b**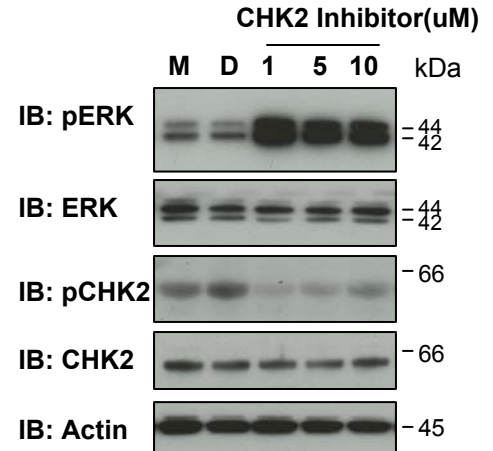**Supplementary Figure S2.**

**ERK1/2 associates with CHK2 and CHK2 inhibition increases ERK1/2 phosphorylation in OCI-LY3 cells.** (a) Equal amounts of cytoplasmic (Cy) and nuclear fraction (Nu) from OCI-LY3 cells were immunoprecipitated with anti-CHK2 antibody followed by immunoblotting with anti-ERK1/2, anti-HuR or anti-CHK2 antibody. Tubulin and HDAC1 were used as markers of the cytoplasmic and nuclear fractions respectively. (b) OCI-LY3 cells were treated with CHK2 inhibitor II in RPMI 1640 complete medium for 4 h. The levels of pCHK2, CHK2, pERK1/2 or ERK1/2 in the total cell lysates were monitored by immunoblotting with the indicated antibodies. M, media; D, DMSO.

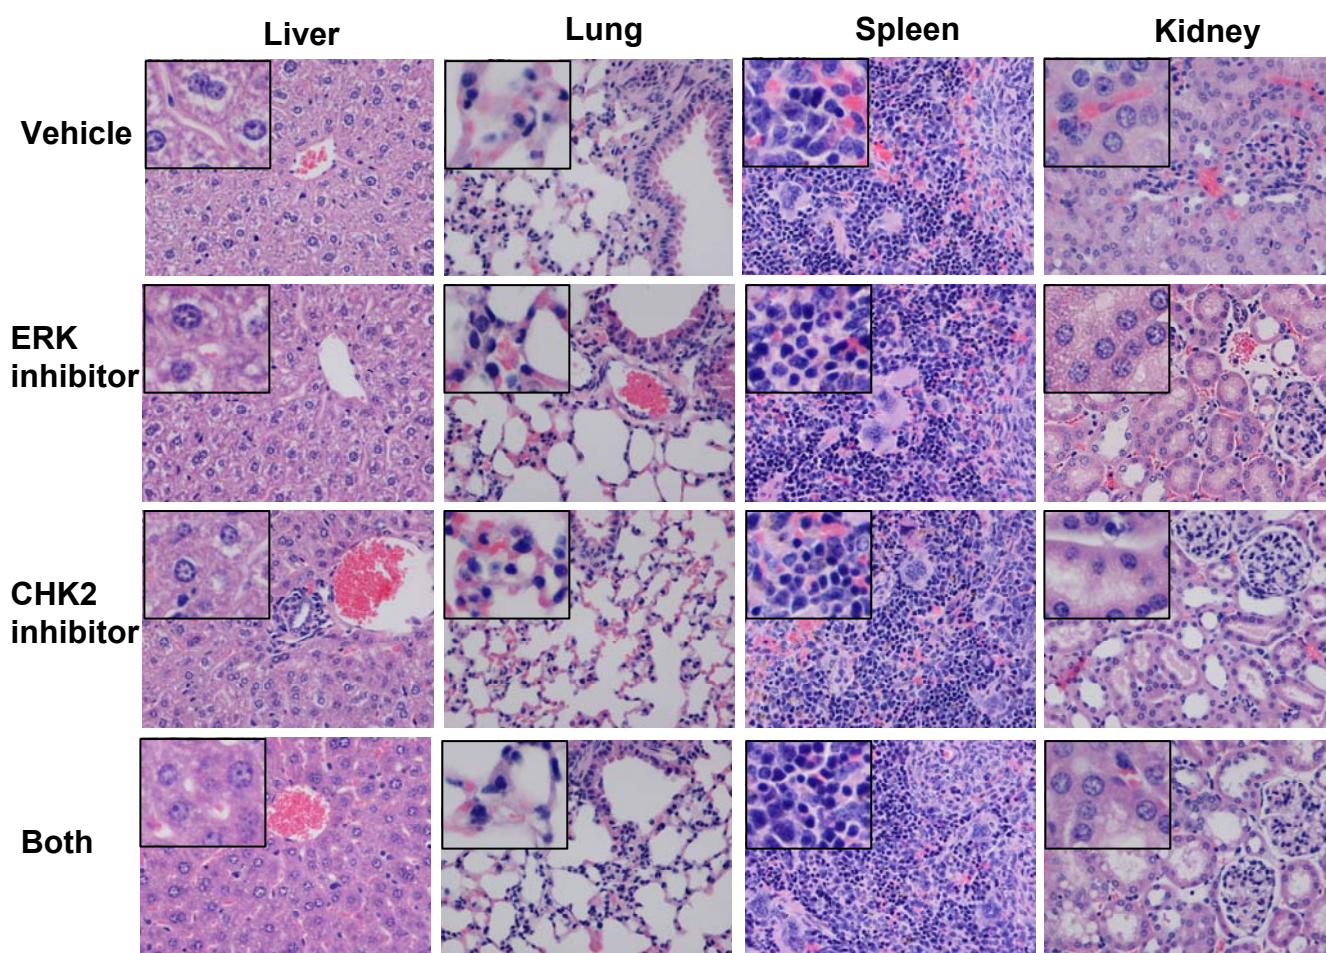

**Supplementary Figure S3.**

**Absence of changes in tissue architecture in mice exposed to ERK inhibitor, CHK2 inhibitor or the combination.** Representative microscopic images ( magnification,  $\times 400$ ) (Hematoxylin & eosin staining) of the tissues harvested from 28 mice treated with vehicle, ERK inhibitor, CHK2 inhibitor or the combination for 20 days.

**a**

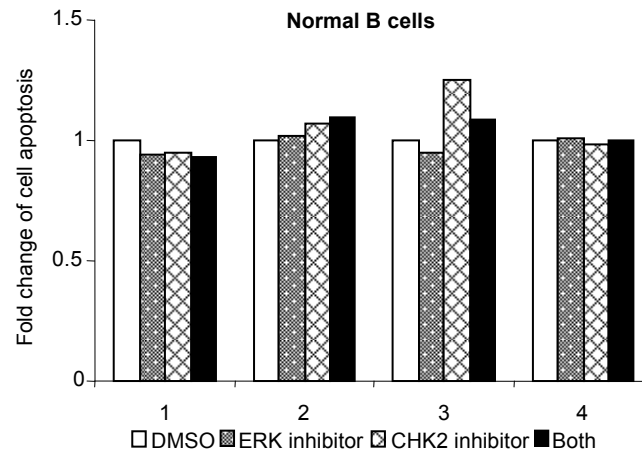

**b**

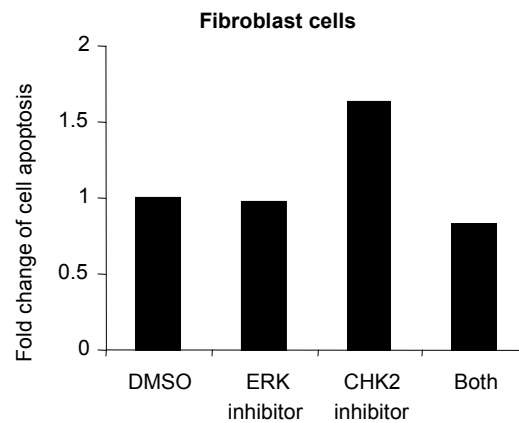

**Supplementary Figure S4.**

**Normal B cells and immortalized untransformed fibroblast (GM04390) cells were relatively resistant to co-administration of ERK inhibitor and CHK2 inhibitor II.** Normal B cells were isolated from healthy donors by immunodepletion of normal T cells from PBLs and then treated with IL -4 (80 U /mL) to expand a B-cell population. Immortalized untransformed fibroblast cell line GM04390 was purchased from Coriell cell Repositories and cultured in minimum essential medium (Invitrogen) supplemented with 20% fetal bovine serum and antibiotics. (a) Four cases of normal B cells from different donors and (b) fibroblast (GM04390) cells were exposed to 5 $\mu$ M CHK2 inhibitor II or 20 $\mu$ M ERK inhibitor alone or in combination for 48hrs after which the percentage of apoptotic cells was determined by Annexin V analysis as described in Materials and Methods.
